# Supplementary material
Source: PubMed Central journal article supplement (PMC1895904)
Supplement: blood_2005-08-3088_2.pdf [file blood_2005-08-3088_2.pdf]

MDSRNVLIY AVNVERKLNAAHHTSEYQT KKLVLRRGQIFTLKVLNRP  
LQPQDELKVT FTSGQRDPY MVELDPVTSY RSKGWQVKIA KQSGVEVILN  
VISAADAVVG RYKMRVNEYK AGVFYLLFNP WCSDDSVFMA SEEERAEYIL  
NDTGYMYMGF AKQIKEKPWT FGQFEKHLS CCFNLLFQLE NNEMQNPVLV  
SRAICTMCA ANGVLMGNW TGDYADGTAP YVWTSSVPIL QQHVVTRMPV  
RYGQCWVFSG ILTTALRAVG IPARSVTNFE SAHDTEKNLT VDIYLDSESK  
TIPHLTKDSV WNFHVWTDW MKRQDLPHGY DGWQVLDSTP QEISDGGFRT  
GPSPLTAIRQ GLIQMKYDIT FVFTEVNGDK FIWLVKQNE REKNLIIAVE  
TASLGKIST KMGENRRED ITLQYRFPEG SPEERKVMASGKPSDDKL  
NSRTLNSLQ ISVLQNSLEL GAPIYLTITL KRKTATPQNV NISCSLNLQT  
YTGKKTNLG VIQTVQIHG QESRVFLTMD ASYYIYKLG M VDEMVIIGF  
IIAEIVDSGE RVATDTTLCF LYSAFSVEMP STGKVKQPLV ITSKFTNTLP  
IPLTNIKFSV ESLGLANMKS WEQETVPPGK TITFQMECTP VKAGPQKFIV  
KFISRQVKEV HAEKVVLISK

Setiady et al. supplementary figure 2
