# Supplementary material
Source: PubMed Central journal article supplement (PMC1895904)
Supplement: blood_2005-08-3088_3.pdf [file blood_2005-08-3088_3.pdf]

MATTPDAAFE TLMNGVTSWD LPKEPISEL LLTGESAFPV MVNDRGQVLI AASSYQQGRL  
VVVSHESYLL HDGLVPFLLN VVKWLCPCPG APIAVHSSLA SLVNLGDSG INALVQPEPG  
EALGVYCID A YNDALTEKLI QFLKNGGGLL IGGQALNWAA HHGHDKVLSI FPGNQVTSVA  
GVYPTDISAN RDWFKVSK EI PNLRLYVQCE DELEDDQQQL LKGMSEIYIE AGVIPSQLLV  
HGQRAFPLGV DNSLNCFLAA ARYGRGRVVL GGNESLILNQ TMLPFVLNAL HWLMGNQTGR  
IGLASDMKVL KSMLPNSSFQ WSESELLTSD LSVFCCCSLA NIDSEEV EEF VAEGGGLLIG  
AEAWSWGRRN PYSSCMTQYP DNIVLKRFG L GITSHVAQRG SFPFPNPEGT NYHFRRLASQ  
FESVIYSRGS SLHESWLNKL SQDCFYMFQM THQRISIYDS VKKHALKMIQ SKDFPVSUTEQ  
YPIARGSSQA FLLSLAYELF KSGVDRS QLL PPPALLPTE SPITIKISTD NDNWVSTGL  
YLPEGQVAQV LLPSEATHAK LKVLIGCHRD NISQARTYFR PPVMTYVYHL TSSQTSISWL  
YGLLYIMVP NKYNQDNVSV TIRGAVSAPY FRLGKTTQEE WKNLITHSKA PWGELATDNI  
ILLTIPTVNLK ELQDPYPLLQ LWDMVRAVA KLAARPPFPQ RAERVVLDKQ ISFGFLHSGY  
PIMGLISIVE GIISEFKIRS HGIWGVHEL GHNHQS GWT FPPHTTEALC NLWTIYVHET  
VLNIPREQAH PSLNPELRRQ RIKYHLNKA PLSNWIMWTA LETYLQLEQ FGWEPFIQVF  
ADYRILSGLP QNNEDKMNLW VKKFSEAVHK NLAPFFEAWG WPVKYAVAKS LASLPEWQEN  
PMKRYTAEGT EGRE (914)

Setiady et al. supplementary Figure 3
